# Supplementary material for: Benzbromarone, Quercetin, and Folic Acid Inhibit Amylin Aggregation
Source: PubMed Central journal article supplement (PMC4926496; doi:10.3390/ijms17060964), 2016-06-18
Supplement: ijms-17-00964-s001.pdf [file ijms-17-00964-s001.pdf]

## Supplementary Materials: Benzbromarone, Quercetin and Folic Acid Inhibit Amylin Aggregation

Laura C. López, Olga Varea, Susanna Navarro, José A. Carrodegua, Natalia Sanchez de Groot, Salvador Ventura and Javier Sancho

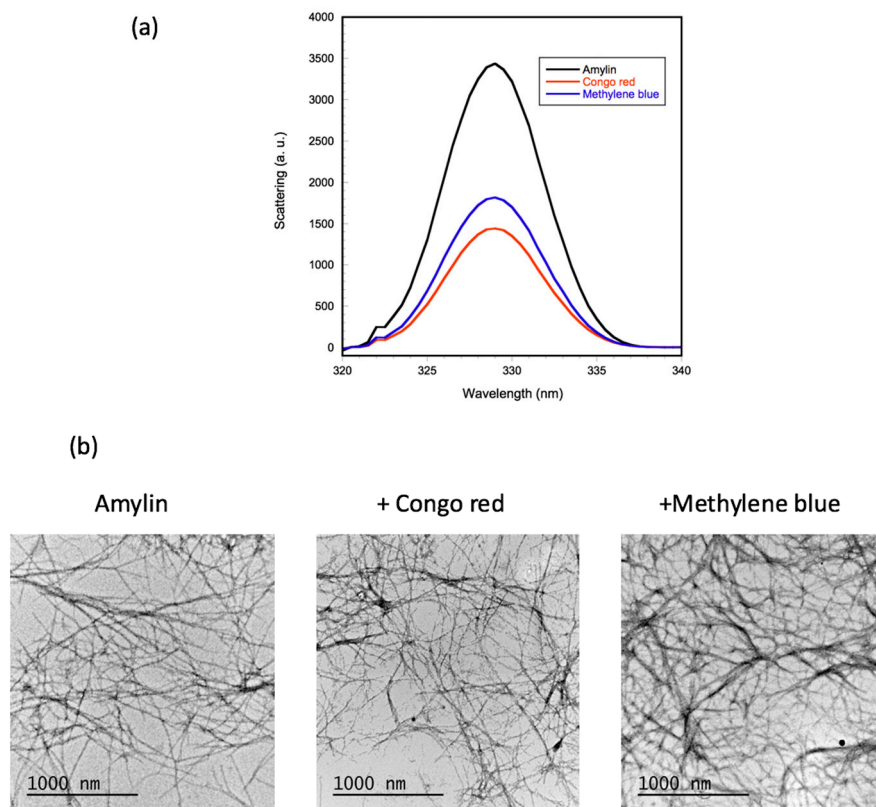

**Figure S1.** (a) Synchronous light scattering of 50  $\mu\text{M}$  amylin (8–37) samples incubated alone or in the presence of Congo red and methylene blue; (b) Negatively stained transmission electron microscopy (TEM) photographs of the same solutions.

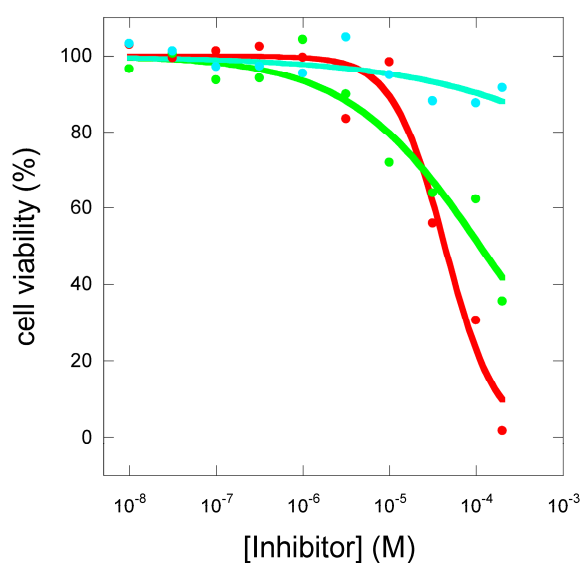

**Figure S2.** Cell viability of HeLa cells in the presence of different concentrations of inhibitory compounds. Red: benzbromarone; green: quercetin; blue: folic acid.
